# Supplementary material
Source: publisher figshare collection journal article supplement (https://springernature.figshare.com/ndownloader/files/17378483)
Supplement: Supplementary file [file 17378483]

## Additional File 2

### Completed checklist of the consolidated criteria for reporting qualitative research (COREQ; (1))

| No                                             | Item                                  | Description                                                                                                                                                                                                                                                                                                                                                                                                                                                                                                                                                       |
|------------------------------------------------|---------------------------------------|-------------------------------------------------------------------------------------------------------------------------------------------------------------------------------------------------------------------------------------------------------------------------------------------------------------------------------------------------------------------------------------------------------------------------------------------------------------------------------------------------------------------------------------------------------------------|
| <b>Domain 1: Research team and reflexivity</b> |                                       |                                                                                                                                                                                                                                                                                                                                                                                                                                                                                                                                                                   |
| <i>Personal characteristics</i>                |                                       |                                                                                                                                                                                                                                                                                                                                                                                                                                                                                                                                                                   |
| 1.                                             | Facilitator                           | Thomas Muth                                                                                                                                                                                                                                                                                                                                                                                                                                                                                                                                                       |
| 2.                                             | Credentials                           | Jeannette Weber (MPH), Stefanie Skodda, Dr. Thomas Muth, Prof. Dr. Peter Angerer, PD Dr. Adrian Loerbroks                                                                                                                                                                                                                                                                                                                                                                                                                                                         |
| 3.                                             | Occupation                            | JW: research associate; SS: medical student; TM, AL: senior research associate; PA: university professor                                                                                                                                                                                                                                                                                                                                                                                                                                                          |
| 4.                                             | Gender                                | JW, SS: female; TM, PA, AL: male                                                                                                                                                                                                                                                                                                                                                                                                                                                                                                                                  |
| 5.                                             | Experience and training               | JW: educational background in biomedical science and public health, practical experience in occupational health research; SS: medical student; TM: educational background in psychology and public health, experience in occupational health research, qualitative research and teaching; PA: educational background in human medical studies, experience as a clinical doctor and in occupational health research; AL: educational background in epidemiology and health sciences, experience in occupational health research, qualitative research and teaching |
| <i>Relationship with participants</i>          |                                       |                                                                                                                                                                                                                                                                                                                                                                                                                                                                                                                                                                   |
| 6.                                             | Relationship established              | No                                                                                                                                                                                                                                                                                                                                                                                                                                                                                                                                                                |
| 7.                                             | Participant knowledge of facilitator  | Participants knew that TM was working as a research associate on student health                                                                                                                                                                                                                                                                                                                                                                                                                                                                                   |
| 8.                                             | Facilitator characteristics           | No other characteristics were reported about the facilitator                                                                                                                                                                                                                                                                                                                                                                                                                                                                                                      |
| <b>Domain 2: Study design</b>                  |                                       |                                                                                                                                                                                                                                                                                                                                                                                                                                                                                                                                                                   |
| <i>Theoretical framework</i>                   |                                       |                                                                                                                                                                                                                                                                                                                                                                                                                                                                                                                                                                   |
| 9.                                             | Methodological orientation and theory | Qualitative content analysis by Mayring                                                                                                                                                                                                                                                                                                                                                                                                                                                                                                                           |
| <i>Participant selection</i>                   |                                       |                                                                                                                                                                                                                                                                                                                                                                                                                                                                                                                                                                   |
| 10.                                            | Sampling                              | Convenience sampling                                                                                                                                                                                                                                                                                                                                                                                                                                                                                                                                              |
| 11.                                            | Method of approach                    | Via social media or personal contact                                                                                                                                                                                                                                                                                                                                                                                                                                                                                                                              |
| 12.                                            | Sample size                           | 68 participants                                                                                                                                                                                                                                                                                                                                                                                                                                                                                                                                                   |
| 13.                                            | Non-participation                     | Not applicable                                                                                                                                                                                                                                                                                                                                                                                                                                                                                                                                                    |
| <i>Setting</i>                                 |                                       |                                                                                                                                                                                                                                                                                                                                                                                                                                                                                                                                                                   |
| 14.                                            | Setting of data collection            | Conference room at university                                                                                                                                                                                                                                                                                                                                                                                                                                                                                                                                     |
| 15.                                            | Presence of non-participants          | Two doctoral students who took field notes                                                                                                                                                                                                                                                                                                                                                                                                                                                                                                                        |
| 16.                                            | Description of sample                 | Mean <sub>age</sub> =24 (range: 18-34 years); female = 77%, male = 23%                                                                                                                                                                                                                                                                                                                                                                                                                                                                                            |
| <i>Data collection</i>                         |                                       |                                                                                                                                                                                                                                                                                                                                                                                                                                                                                                                                                                   |
| 17.                                            | Interview guide                       | Provided as supplemental material                                                                                                                                                                                                                                                                                                                                                                                                                                                                                                                                 |
| 18.                                            | Repeat interviews                     | None                                                                                                                                                                                                                                                                                                                                                                                                                                                                                                                                                              |
| 19.                                            | Audio/visual recording                | Audio recording                                                                                                                                                                                                                                                                                                                                                                                                                                                                                                                                                   |
| 20.                                            | Field notes                           | Yes                                                                                                                                                                                                                                                                                                                                                                                                                                                                                                                                                               |
| 21.                                            | Duration                              | Circa 90 minutes                                                                                                                                                                                                                                                                                                                                                                                                                                                                                                                                                  |
| 22.                                            | Data saturation                       | Yes                                                                                                                                                                                                                                                                                                                                                                                                                                                                                                                                                               |
| 23.                                            | Transcripts returned                  | No                                                                                                                                                                                                                                                                                                                                                                                                                                                                                                                                                                |
| <b>Domain 3: Analysis and findings</b>         |                                       |                                                                                                                                                                                                                                                                                                                                                                                                                                                                                                                                                                   |
| 24.                                            | Number of data coders                 | Two                                                                                                                                                                                                                                                                                                                                                                                                                                                                                                                                                               |
| 25.                                            | Description of coding tree            | Provided as supplemental material                                                                                                                                                                                                                                                                                                                                                                                                                                                                                                                                 |
| 26.                                            | Derivation of themes                  | Deductive coding: Stressors, resources, suggestions for improvement; all other categories were inductively coded                                                                                                                                                                                                                                                                                                                                                                                                                                                  |
| 27.                                            | Software                              | MaxQDA 12                                                                                                                                                                                                                                                                                                                                                                                                                                                                                                                                                         |
| 28.                                            | Participant checking                  | No                                                                                                                                                                                                                                                                                                                                                                                                                                                                                                                                                                |
| <i>Reporting</i>                               |                                       |                                                                                                                                                                                                                                                                                                                                                                                                                                                                                                                                                                   |
| 29.                                            | Quotations presented                  | Yes                                                                                                                                                                                                                                                                                                                                                                                                                                                                                                                                                               |
| 30.                                            | Data and findings consistent          | Yes                                                                                                                                                                                                                                                                                                                                                                                                                                                                                                                                                               |
| 31.                                            | Clarity of major themes               | Yes                                                                                                                                                                                                                                                                                                                                                                                                                                                                                                                                                               |
| 32.                                            | Clarity of minor themes               | Yes                                                                                                                                                                                                                                                                                                                                                                                                                                                                                                                                                               |

1. Tong A, Sainsbury P, Craig J. Consolidated criteria for reporting qualitative research (COREQ): a 32-item checklist for interviews and focus groups. *International Journal for Quality in Health Care*. 2007;19(6):349-357.
